# Supplementary material
Source: Royal Society of Chemistry journal article supplement (doi:10.1039/d6cc02401g)
Supplement: d6cc02401g1.pdf [file d6cc02401g1.pdf]

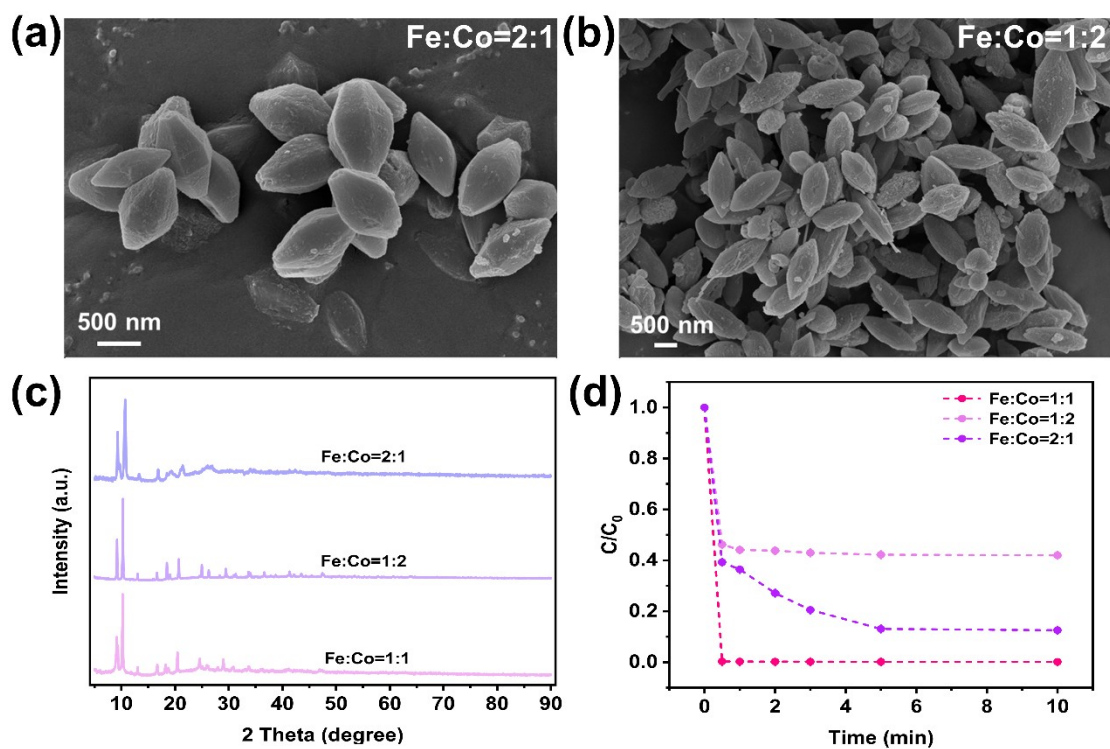

Fig. S1 SEM images of MIL-101(CoFe)-NH<sub>2</sub> prepared with Fe:Co precursor feeding ratios of 2:1 (a) and 1:2 (b); XRD patterns (c) and degradation performance (d) of MIL-101(CoFe)-NH<sub>2</sub> samples prepared with different Fe:Co precursor feeding ratios

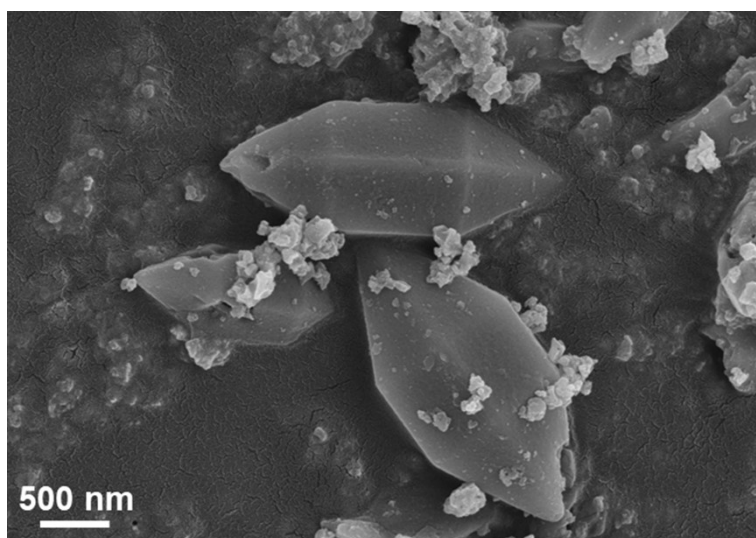

Fig. S2 SEM image of MIL-101(Fe)-NH<sub>2</sub>

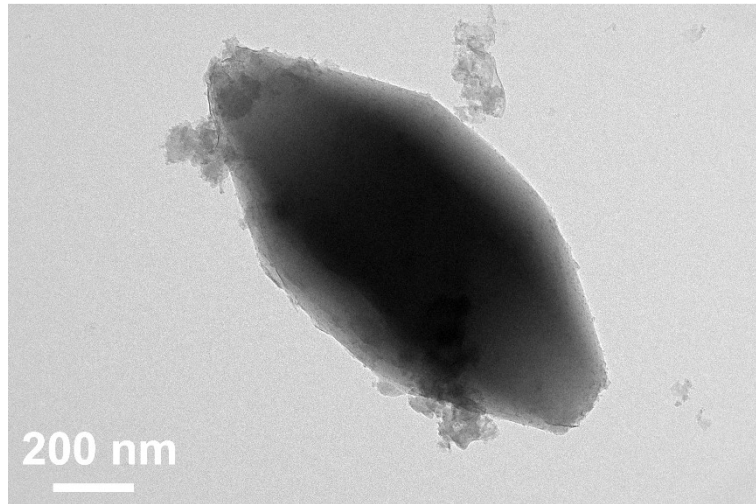

Fig. S3 TEM image of MIL-101(CoFe)-NH<sub>2</sub>

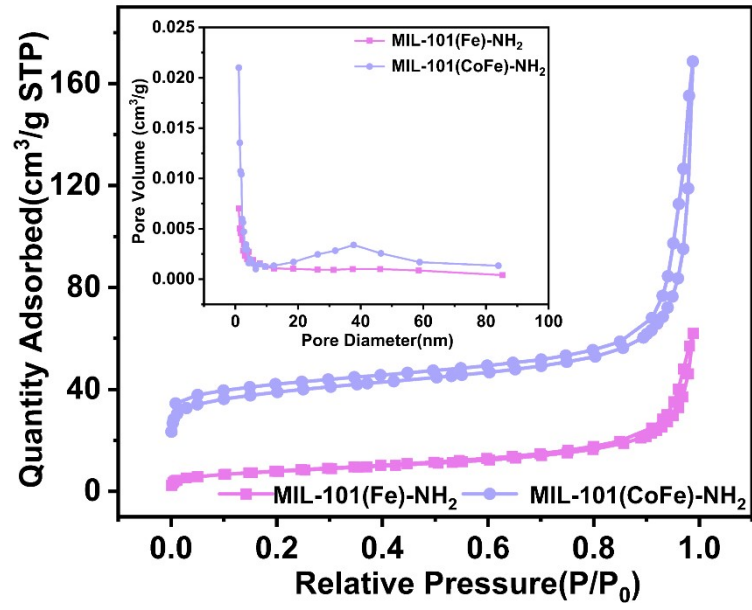

Fig. S4 BET diagrams of MIL-101(Fe)-NH<sub>2</sub> and MIL-101(CoFe)-NH<sub>2</sub> materials

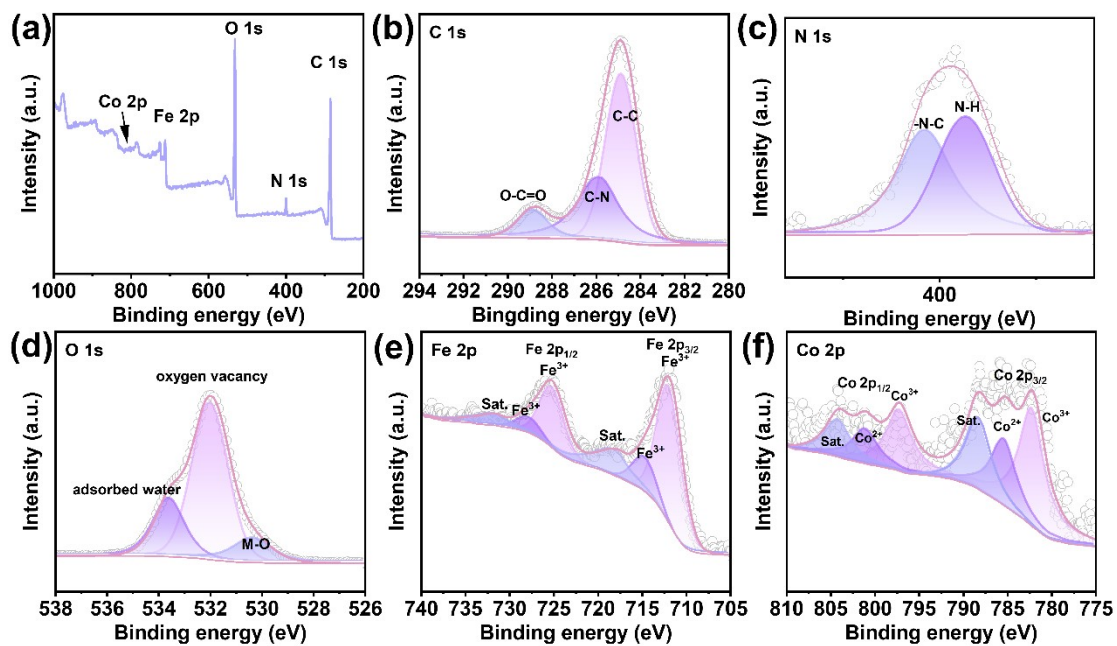

Fig. S5 XPS spectra of MIL-101(CoFe)-NH<sub>2</sub>: survey spectrum (a), C 1s (b), N 1s (c), O 1s (d), Fe 2p (e) and Co 2p (f)

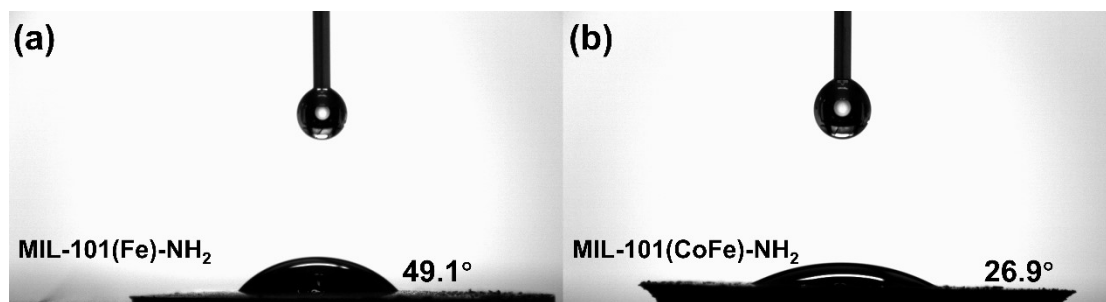

Fig. S6 Contact angles of MIL-101(Fe)-NH<sub>2</sub> (a) and MIL-101(CoFe)-NH<sub>2</sub> (b)

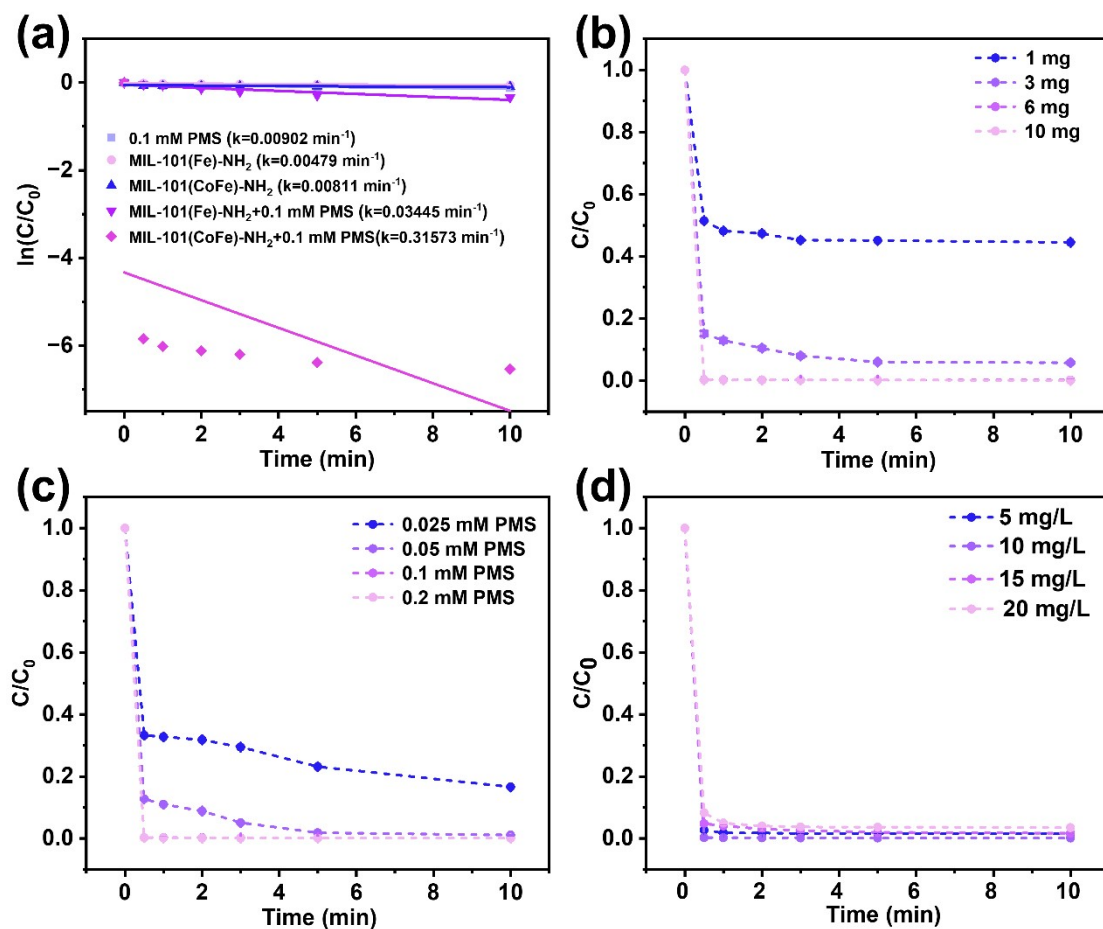

Fig. S7 Pseudo-first-order kinetic fitting plots of degradation performance of various catalysts (a); Effects of different conditions on the degradation of SDZ by MIL-101(CoFe)-NH<sub>2</sub>: catalyst dosage (b), PMS dosage (c), and pollutant concentration (d)

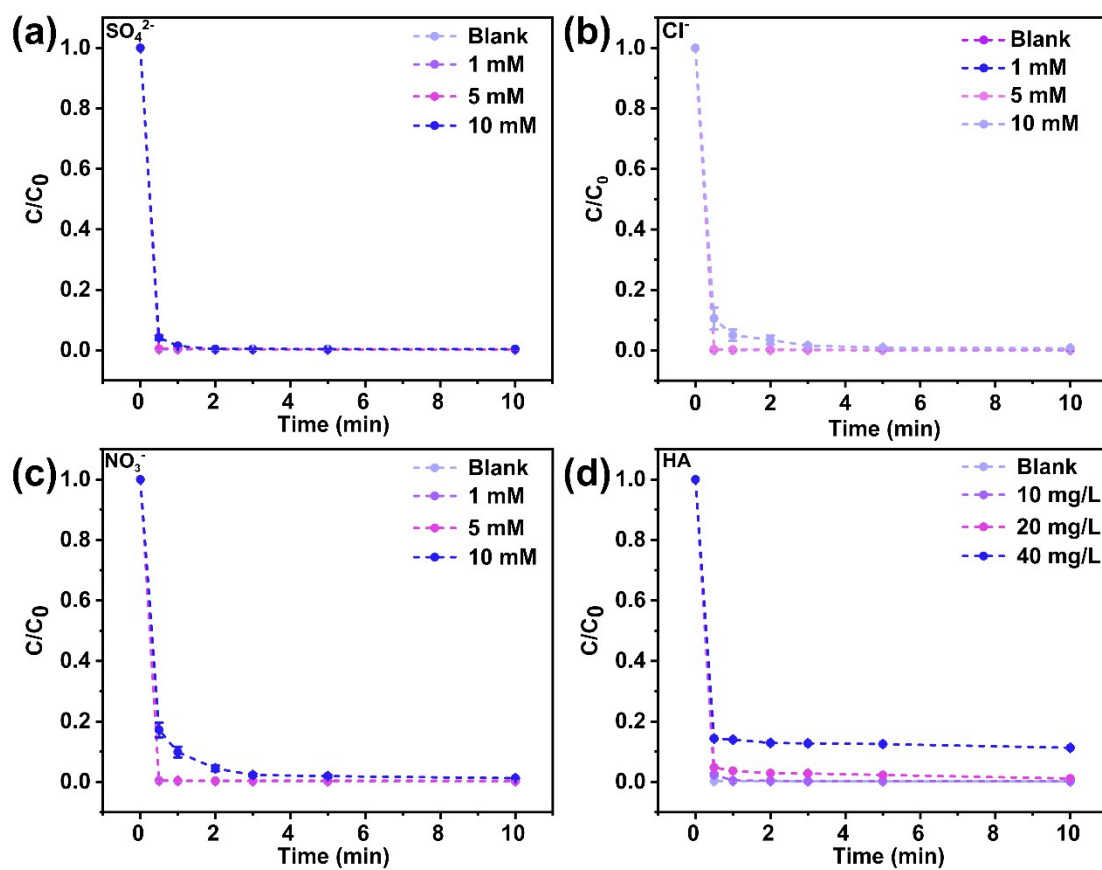

Fig. S8 Effect of coexisting ions and humic acid on the degradation of SDZ by MIL-101(CoFe)-NH<sub>2</sub>: SO<sub>4</sub><sup>2-</sup> (a), Cl<sup>-</sup> (b), NO<sub>3</sub><sup>-</sup> (c) and HA (d)

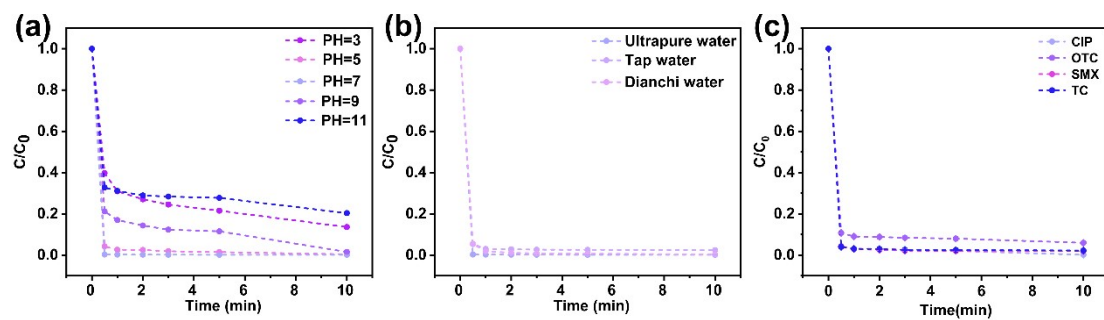

Fig. S9 Effect of different pH (a) and different experimental water bodies (b) on the degradation of SDZ by MIL-101(CoFe)-NH<sub>2</sub>; Removal ability of MIL-101(CoFe)-NH<sub>2</sub> catalyst for different antibiotics (c)

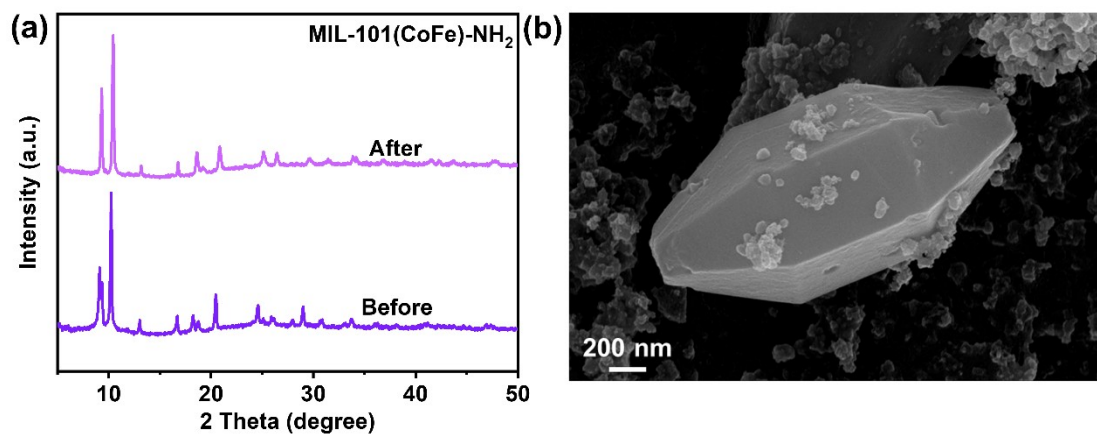

Fig. S10 XRD and SEM of MIL-101(CoFe)-NH<sub>2</sub> after cycling

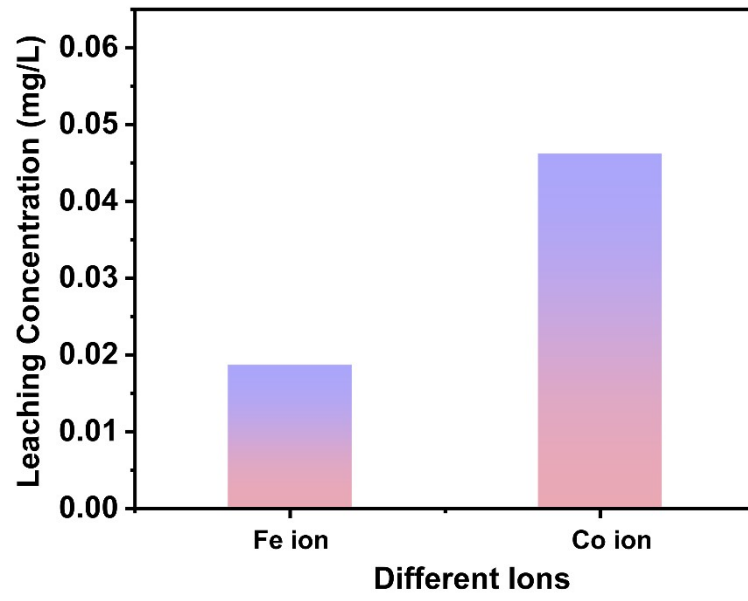

Fig. S11 Leaching concentration of Fe and Co ions

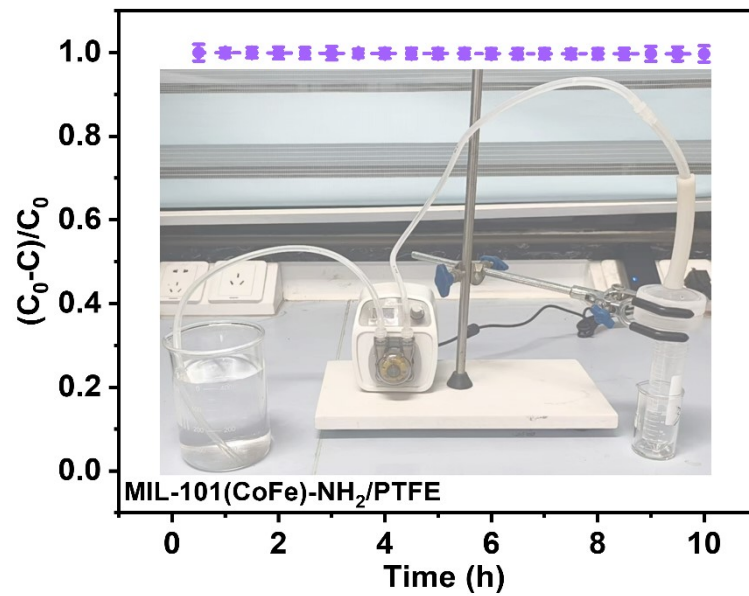

Fig. S12 Continuous flow degradation diagram of MIL-101(CoFe)-NH<sub>2</sub>/PTFE membrane

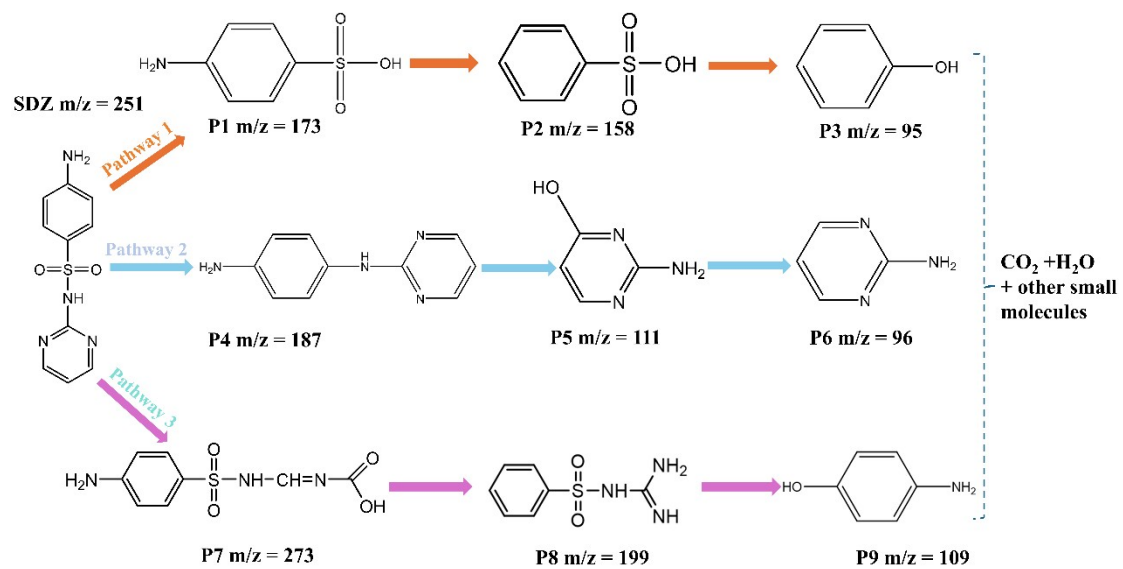

Fig. S13 Possible reaction pathways of SDZ degradation in the MIL-101(CoFe)-NH<sub>2</sub>/PMS system

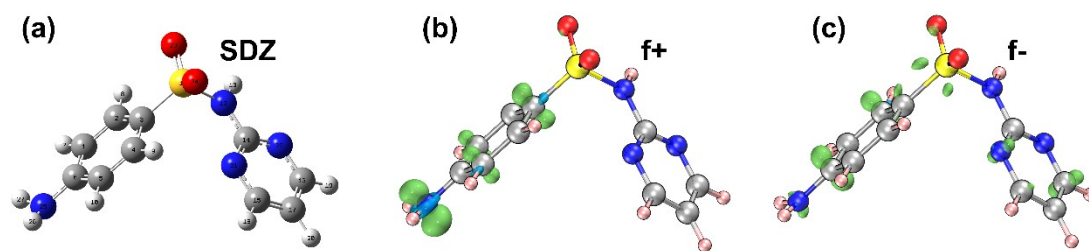

Fig. S14 SDZ molecular structure (a), SDZ Fukui function ( $f^+$ ) (b) and SDZ Fukui function ( $f^-$ ) (c) in the MIL-101(CoFe)-NH<sub>2</sub>/PMS system

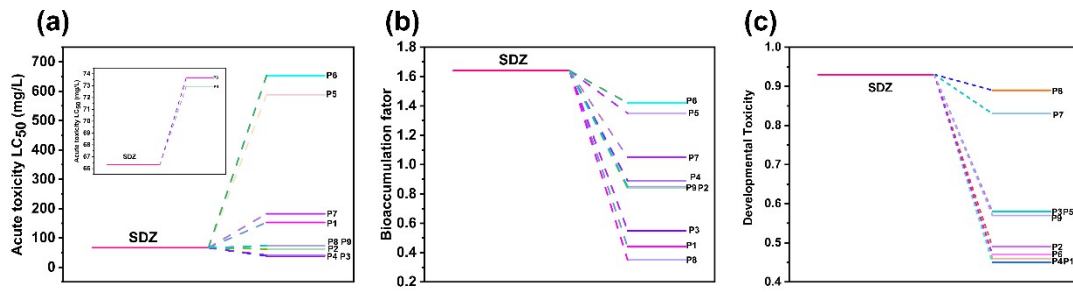

Fig. S15 Acute toxicity (a), bioaccumulation factor (b), and developmental toxicity (c) of different degradation products

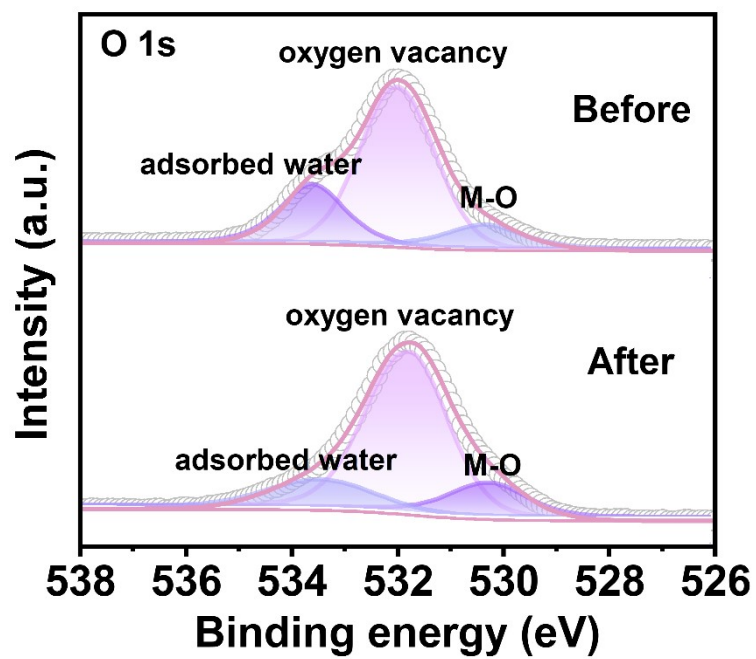

Fig. S16 XPS spectra of O 1s for MIL-101(CoFe)-NH<sub>2</sub> before and after the reaction

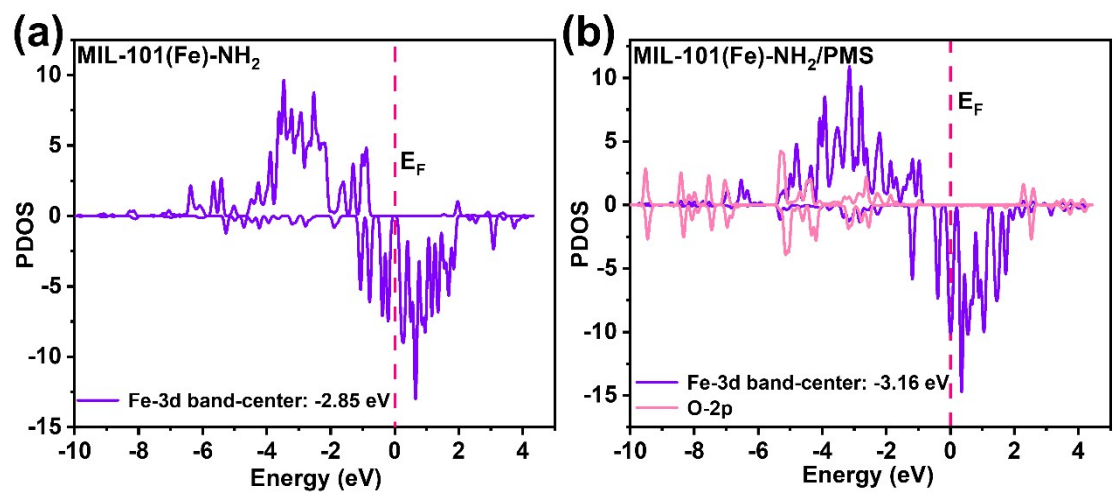

Fig. S17 The density of states of MIL-101(Fe)-NH<sub>2</sub> and the adsorbed PMS

**(a)** MIL-101(Fe)-NH<sub>2</sub>/PMS

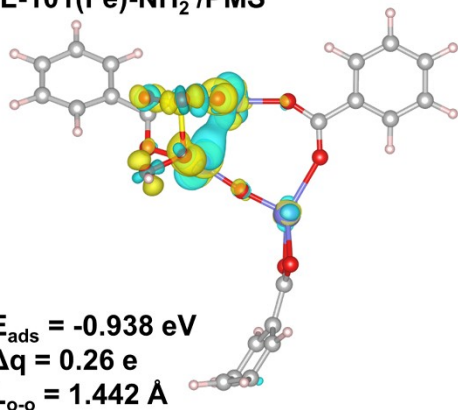

**(b)** MIL-101(CoFe)-NH<sub>2</sub>/PMS

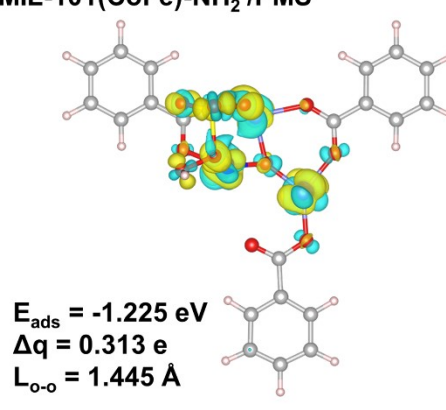

Fig. S18 The differential charge density of adsorbed PMS

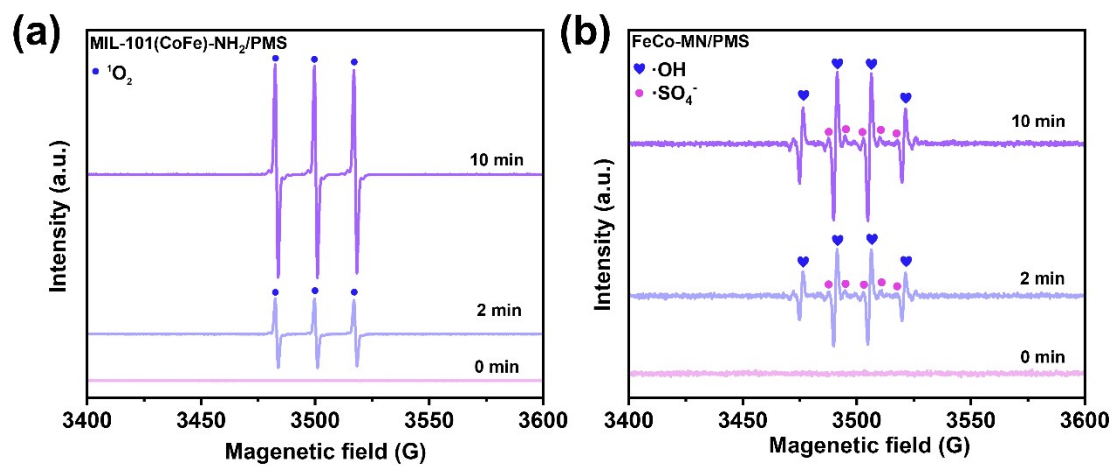

Fig. S19 TEMP-<sup>1</sup>O<sub>2</sub> test (a) and DMPO-·OH and ·SO<sub>4</sub><sup>-</sup> tests (b) of MIL-101(CoFe)-NH<sub>2</sub>

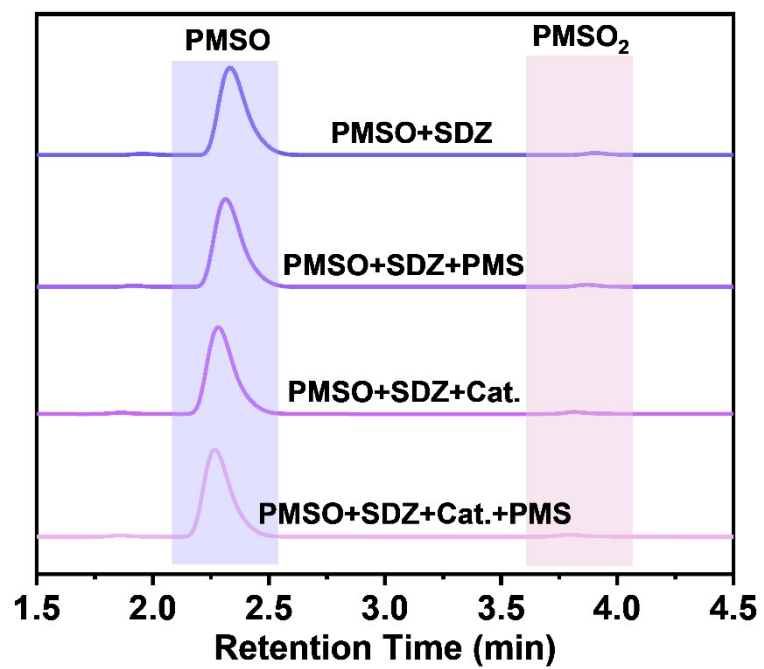

Fig. S20 PMSO-high-valent metal species test of MIL-101(CoFe)-NH<sub>2</sub>
